# Supplementary material for: Ultrathin MoS2 nanosheets for high-performance photoelectrochemical applications via plasmonic coupling with Au nanocrystals
Source: Royal Society of Chemistry journal article supplement (doi:10.1039/c8nr10320h), 2019-01-01
Supplement: c8nr10320h1.pdf [file c8nr10320h1.pdf]

## Supporting Information

### Ultrathin MoS<sub>2</sub> Nanosheets for High-Performance Photoelectrochemical Applications Via Plasmonic Coupling with Au Nanocrystals

Asad Ali,<sup>a,b</sup> Farhana Akbar Mangrio,<sup>c</sup> Xiaolin Chen,<sup>d</sup> Yiwen Dai,<sup>e</sup> Kui Chen,<sup>b</sup> Xiaoliang Xu,<sup>\*b</sup>  
Ruixiang Xia,<sup>\*a</sup> and Lixin Zhu<sup>\*a</sup>

<sup>a</sup> *Department of Surgery & Central Laboratory, the First Affiliated Hospital of Anhui Medical University, Hefei 230022, PR China.*

<sup>b</sup> *Key Laboratory of Strongly-Coupled Quantum Matter Physics, Chinese Academy of Sciences, School of Physical Sciences, University of Science and Technology of China, Hefei, Anhui 230026, China.*

<sup>c</sup> *School of Engineering Science, University of Science and Technology of China, Hefei 230027, China.*

<sup>d</sup> *Department of Optics and Optical Engineering, University of Science and Technology of China, Hefei, Anhui 230026, China.*

<sup>e</sup> *Department of General Surgery, the Second Affiliated Hospital of Anhui Medical University, Hefei 230601, PR China.*

Keywords: MoS<sub>2</sub>, Au nanocrystals, Plasmonic, FEM simulation, and PEC Water Splitting

\*Corresponding authors: Zhu LX (lx-zhu@163.com); Xia RX ([xrx2041@163.com](mailto:xrx2041@163.com)); and Xu XL (xlxu@ustc.edu.cn)

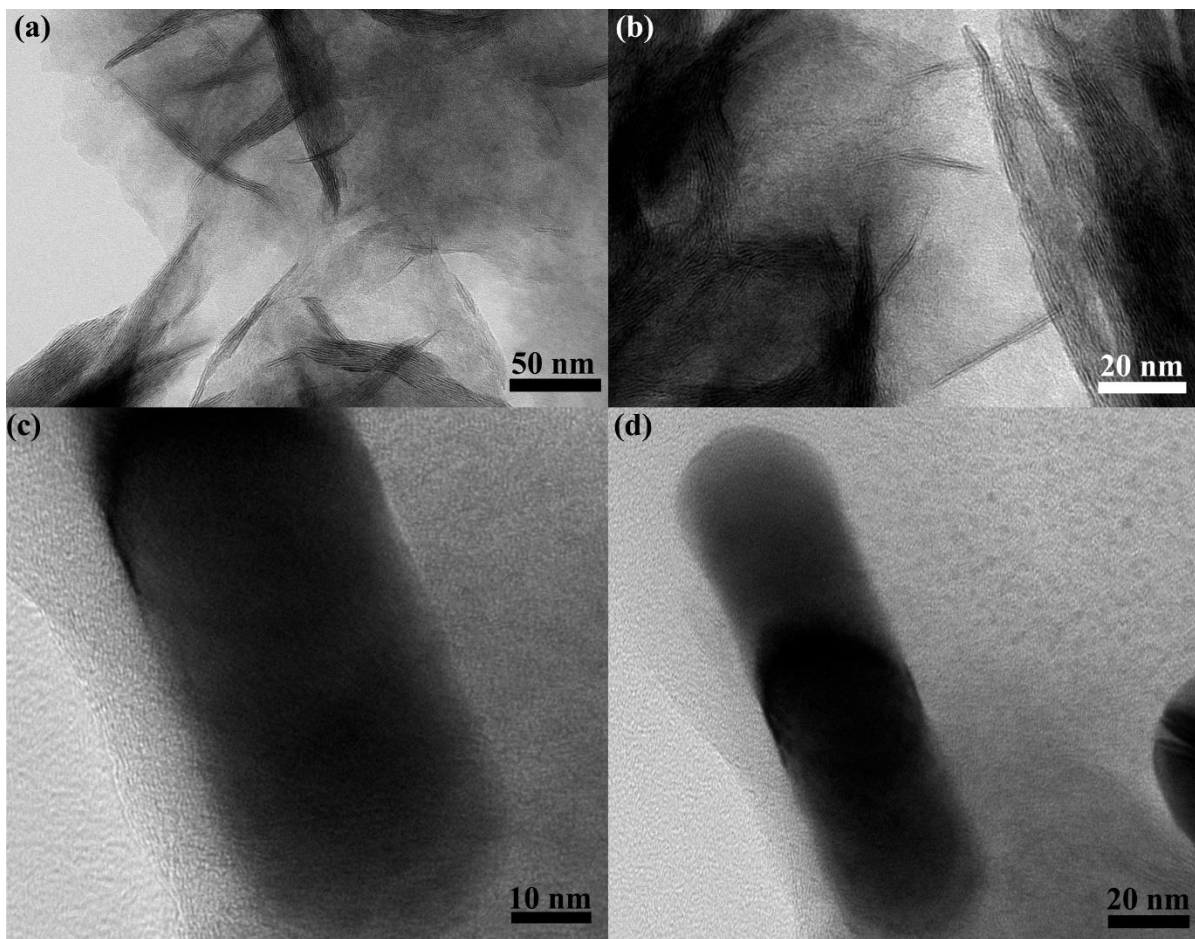

**Figure S1.** (a & b) The cross-sectional HRTEM images represent ultrathin MoS<sub>2</sub> nanosheets. The AuNRs-MoS<sub>2</sub> hybrid nanostructure with different resolution.

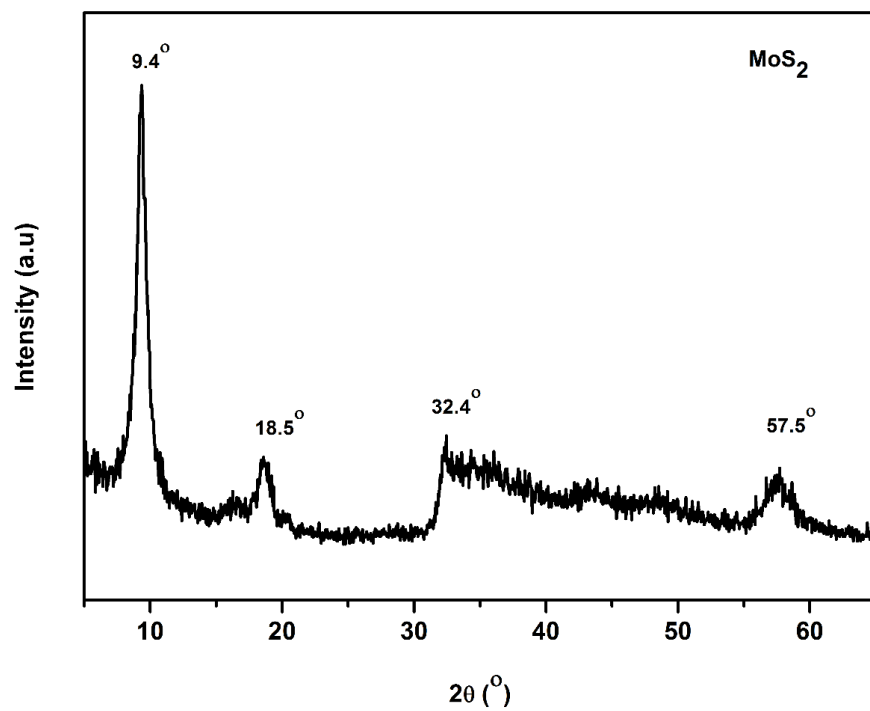

**Figure S2.** The XRD analysis of the pristine ultrathin MoS<sub>2</sub> nanosheets.

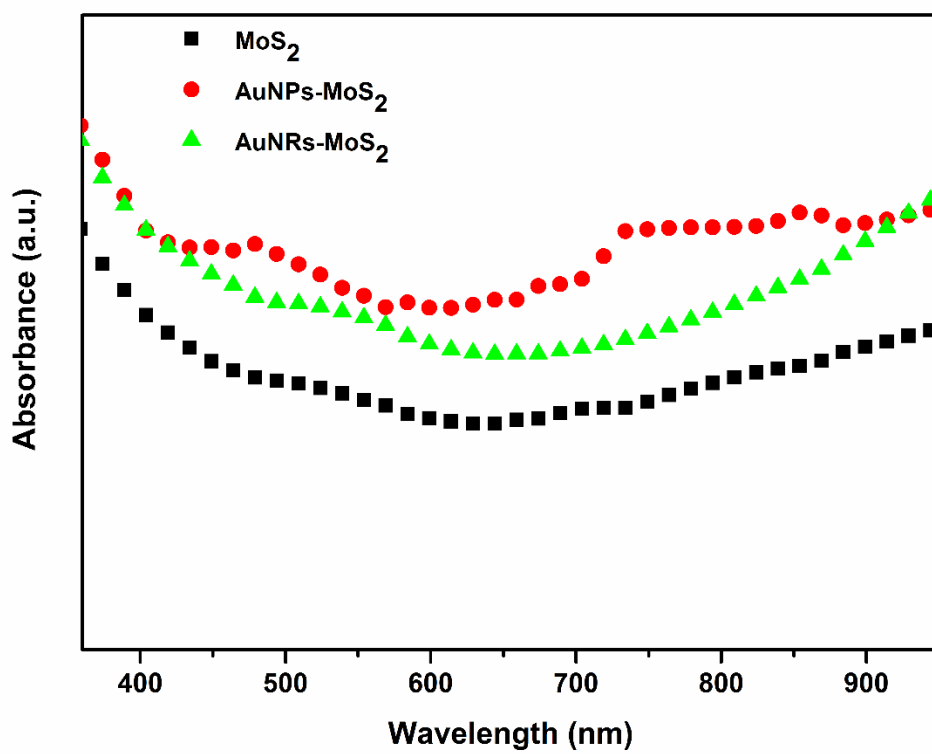

**Figure S3.** The UV-Vis Diffuse Reflectance Spectra of the pristine ultrathin MoS<sub>2</sub> nanosheets and Au/MoS<sub>2</sub> hybrid heterostructure.

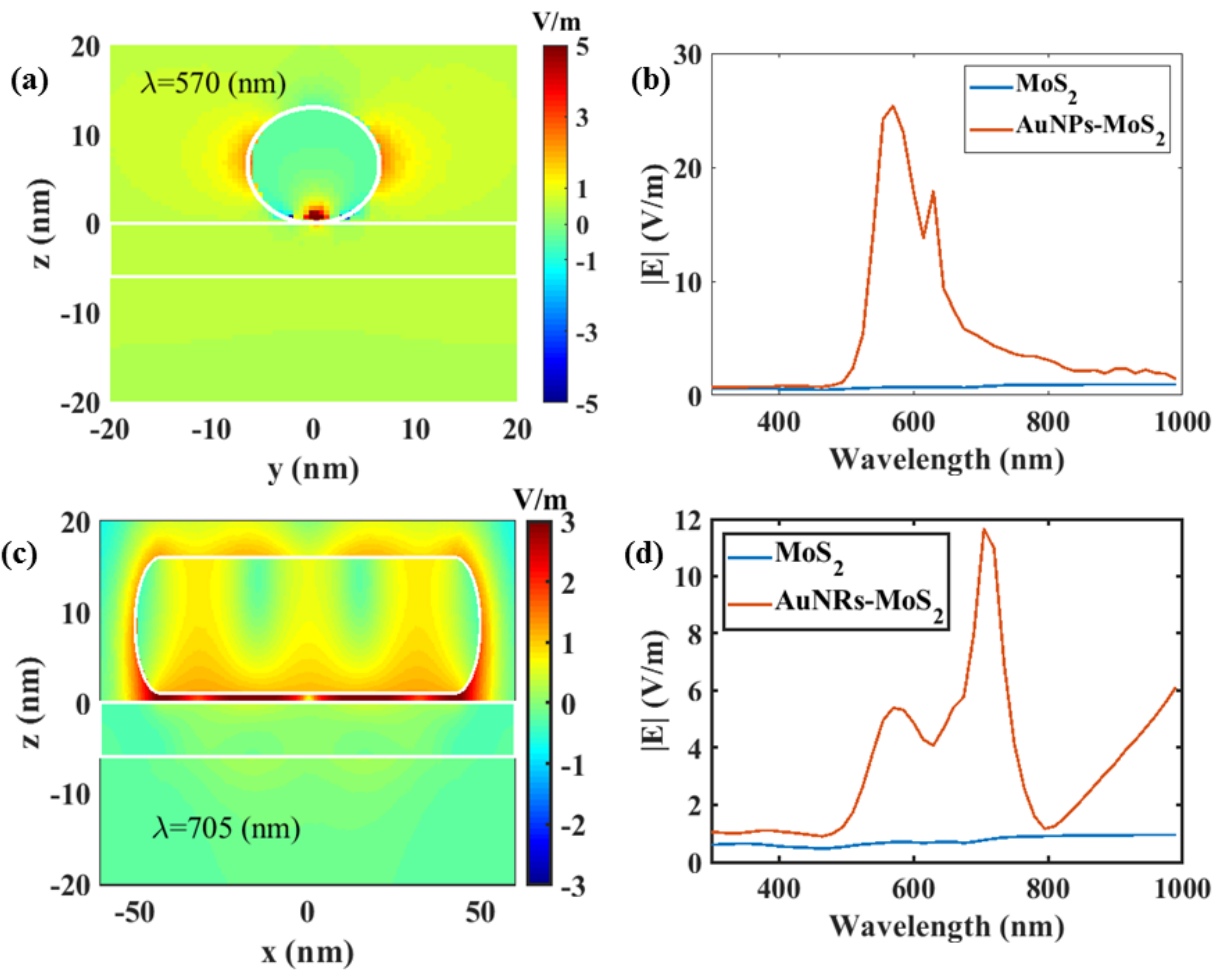

**Figure S4.** The calculated electric field intensity map as a function of wavelength and spatial distributions of the electric field on the  $y$ - $z$  plane (a & b) AuNPs-MoS<sub>2</sub> hybrid, (c & d) AuNRs-MoS<sub>2</sub> hybrid and pristine MoS<sub>2</sub> nanosheets.
